# Supplementary material for: Nanoscopic investigation of C9orf72 poly-GA oligomers on nuclear membrane disruption by a photoinducible platform
Source: Springer Nature journal article supplement (doi:10.1038/s42004-021-00547-6), 2021-07-23
Supplement: MOESM1 [file 42004_2021_547_MOESM1_ESM.pdf]

## **Description of Additional Supplementary Files**

**File Name:** Supplementary Data 1

**Description:** This Microsoft Excel file includes raw statistical data from experiments, two-sided Welch's T test's statistics, and multiple comparison correction results.
